# Supplementary material for: Noise-induced masking of hearing in a labyrinth fish: effects on sound detection in croaking gouramis
Source: PeerJ. 2022 Nov 10;10:e14230. doi: 10.7717/peerj.14230 (PMC9657181; doi:10.7717/peerj.14230)
Supplement: Supplemental Information 1 — All SPLs are given in dB re 1 µPa. [file peerj-10-14230-s001.xlsx]

## Sheet: Tabelle1
Individual Differences
	100	500	1000	1500	2000	4000
W1	8	10	12	16	12	24
W2	15	16	20	20	20	20
W3	8	16	15	19	15	15
W4	17	16			14
W5	12	12	12	16	9
W6	15	10	12	24	13	14
W7	10	11	15	19	12	10
W8	11	14	12	20	11	15
W9	12	7	2	16	11	11
W10	9	7	8	16	15
Mean	11.7	11.9	12	18.4444	13.2	15.5714
Lab Noise
NN	N = 10
	100	500	1000	1500	2000	4000
W1	98	91	87	83	90	107
W2	92	89	83	88	86	108
W3	99	89	88	86	91	105
W4	95	89	82	84	97	112
W5	100	93	90	88	97	108
W6	92	94	90	83	93	107
W7	97	92	91	88	92	112
W8	96	94	94	87	96	106
W9	95	96	99	87	88	110
W10	100	97	98	81	91	112
Mean	96.4	92.4	90.2	85.5	92.1	108.7
White Noise
WN	N = 10		N = 9			N = 7
	100	500	1000	1500	2000	4000
	106	101	99	99	102	123
	107	105	103	108	106	116
	107	105	103	105	106	120
	112	105	102	104	111	121
	112	105	102	107	106	122
	107	104	106	107	106	121
	107	103	106	107	104	121
	107	108	101	103	107
	107	103	106	97	99
	109	104			106
	108.1	104.3	103.111	104.111	105.3	120.571
Frequency	Lab-Noise			White Noise			Differences
	Mean	SE	N	Mean	SE	N	Mean	SE	N
100	96.4	1043	10	108.1	0.142	10	11.7	1106	10
500	92.4	1010	10	104.3	0.828	10	11.9	1290	10
1000	90.2	1948	10	103.111	0.961	9	12	2068	9
1500	85.5	0.816	10	104.111	1203	9	18.4444	1033	9
2000	92.1	1242	10	105.3	1084	10	13.2	1212	10
4000	108.7	2160	10	120.571	0.841	7	15.5714	1862	7
